# Supplementary material for: Single haplotype assembly of the human genome from a hydatidiform mole
Source: HighWire-hosted journal article supplement (doi:10.1101/gr.180893.114), 2014-11-04
Supplement: BioNano_map_analysis.docx [file BioNano_map_analysis.docx]

**BioNano map compared to PacBio Events**

We describe some preliminary analyses on the BioNano data here:

BioNano ran their SV alignment software by aligning BioNano map contigs to the CHM1_1.1 assembly and then we examined their calls.

|  | Total deletions | Total bp deletions | Total insertions | Total bp insertions |
| --- | --- | --- | --- | --- |
| >5kb | 198 | 24,241,947 | 213 | 5,957,316 |
| >10kb | 121 | 23,738,421 | 107 | 5,221,987 |

The calls are relative to the BioNano data, so deletions will occur where BioNano has less data. Many of these fall across gaps, that we have likely sized too big and could explain why the deletion numbers are much higher than insertions.

There were several cases where the PacBio didn't span a gap, was very fragmented in the region, or was otherwise not straightforward, and that explains why the pro-BioNano + pro-Illumina numbers don't add up to the total Deletions or Insertions.

There were 31 inversion events, 7 inter chromosomal events, and 31 intra chromosomal events; however, these kinds of complex SVs are still very difficult to call with this technology.

We then compared the 'normal' alignments of the map contigs to the assembly by totaling the span of the map contigs and the span of the referene. This is a slightly different algorithm that the alignments done for SVs, to see how much of the genome is covered by map contigs.

This should provide a percent of the genome covered by BioNano data.

Those totals are below:

Total map contig span 2,762,450,797

Total CHM1_1.1 contig span 2,774,982,887

Total CHM1_1.1 sequence length is 3,037,866,619

Total CHM1_1.1 seq len without gaps is 2,827,636,807bp

Finally, we carefully examined a subset of called BioNano insertions and deletions on chromosomes 3 and 7 and compared them to the PacBio data at these loci:

29 Deletion SVs called in BioNano map aligned to CHM1_1.1 assembly

18 Cases where the PacBio supported the BioNano SV call

15 of these were in gaps

8 Cases where the PacBio supported the CHM1_1.1 Illumina Assembly

45 Insertion SVs called in BioNano map aligned to CHM1_1.1 assembly

20 Cases where the PacBio supported the BioNano SV call

10 of these were in gaps

17 Cases where the PacBio supported the CHM1_1.1 Illumina Assembly

In conclusion, there are a few deletions and insertions called when the BioNano data is aligned to the CHM1_1.1 assembly. When we combine this analysis with PacBio data we find that many of these calls are in gaps and are likely artifacts. There are some cases where the PacBio data supports the BioNano data SV calls, and these are loci that we plan to investigate further using targeted BAC sequencing and these two independently generated genomic resources. The BioNano map and PacBio data were not available before the assembly was complete but the data from these sources is consistent with our conclusions that we have created a high quality draft genome assembly.
